# Supplementary material
Source: ML conference proceedings conference paper supplement (https://openaccess.thecvf.com/content/CVPR2025/html/Buch_Flexible_Frame_Selection_CVPR_2025_paper.html)
Supplement: Supplementary file 1 [file Buch_Flexible_Frame_Selection_CVPR_2025_supplemental.pdf]

# **Flexible Frame Selection for Efficient Video Reasoning**

## **Supplementary Material**

Please refer to the project webpage (<https://ffs-video.github.io>) for the full supplementary material - thank you!
